# Supplementary material
Source: publisher site journal article supplement (https://www.spandidos-publications.com/4205/downloadSupplementary)
Supplement: Supplementary file 1 [file downloadSupplementary]

Table SI. One-way ANOVA reveals significant differences between TP53-mutated and TP53 wild-type human leukaemia cell lines.

| Cell lines (A) vs. (B) | logLC <sub>50</sub> (A) (nM) | logLC <sub>50</sub> (B) (nM) | Mean difference | Significance | P-value |
|------------------------|------------------------------|------------------------------|-----------------|--------------|---------|
| RS4;11 vs. NALM-19     | 2.222                        | 2.386                        | -0.1642         | No           | 0.4579  |
| RS4;11 vs. MV4;11      | 2.222                        | 2.430                        | -0.2078         | No           | 0.1376  |
| RS4;11 vs. RCH-ACV     | 2.222                        | 2.476                        | -0.2535         | Yes          | 0.0260  |
| RS4;11 vs. REH         | 2.222                        | 2.652                        | -0.4298         | Yes          | 0.0023  |
| RS4;11 vs. Jurkat      | 2.222                        | 2.719                        | -0.4968         | Yes          | <0.0001 |
| RS4;11 vs. THP-1       | 2.222                        | 2.833                        | -0.6107         | Yes          | <0.0001 |
| RS4;11 vs. U-937       | 2.222                        | 2.749                        | -0.5269         | Yes          | <0.0001 |
| NALM-19 vs. MV4;11     | 2.386                        | 2.430                        | -0.04359        | No           | 0.4579  |
| NALM-19 vs. RCH-ACV    | 2.386                        | 2.476                        | -0.08931        | No           | 0.1376  |
| NALM-19 vs. REH        | 2.386                        | 2.652                        | -0.2656         | Yes          | 0.0209  |
| NALM-19 vs. Jurkat     | 2.386                        | 2.719                        | -0.3326         | Yes          | 0.0015  |
| NALM-19 vs. THP-1      | 2.386                        | 2.833                        | -0.4465         | Yes          | <0.0001 |
| NALM-19 vs. U-937      | 2.386                        | 2.749                        | -0.3627         | Yes          | 0.0004  |
| MV4;11 vs. RCH-ACV     | 2.430                        | 2.476                        | -0.04572        | No           | 0.4579  |
| MV4;11 vs. REH         | 2.430                        | 2.652                        | -0.2220         | No           | 0.1171  |
| MV4;11 vs. Jurkat      | 2.430                        | 2.719                        | -0.2890         | Yes          | 0.0150  |
| MV4;11 vs. THP-1       | 2.430                        | 2.833                        | -0.4029         | Yes          | 0.0004  |
| MV4;11 vs. U-937       | 2.430                        | 2.749                        | -0.3191         | Yes          | 0.0047  |
| RCH-ACV vs. REH        | 2.476                        | 2.652                        | -0.1763         | No           | 0.4095  |
| RCH-ACV vs. Jurkat     | 2.476                        | 2.719                        | -0.2433         | No           | 0.0909  |
| RCH-ACV vs. THP-1      | 2.476                        | 2.833                        | -0.3572         | Yes          | 0.0047  |
| RCH-ACV vs. U-937      | 2.476                        | 2.749                        | -0.2734         | Yes          | 0.0373  |
| REH vs. Jurkat         | 2.652                        | 2.719                        | -0.06705        | No           | 0.3865  |
| REH vs. THP-1          | 2.652                        | 2.833                        | -0.1809         | Yes          | 0.0455  |
| REH vs. U-937          | 2.652                        | 2.749                        | -0.09715        | No           | 0.2085  |
| Jurkat vs. THP-1       | 2.719                        | 2.833                        | -0.1139         | No           | 0.2568  |
| Jurkat vs. U-937       | 2.719                        | 2.749                        | -0.03010        | No           | 0.6952  |
| THP-1 vs. U-           | 2.833                        | 2.749                        | 0.08377         | No           | 0.4579  |

|     |  |  |  |  |  |
|-----|--|--|--|--|--|
| 937 |  |  |  |  |  |
|-----|--|--|--|--|--|

Human acute leukaemia cell lines were exposed to increasing doses of CBL0137 in duplicate and apoptosis was measured by Annexin-V/7-AAD staining after 72 h. Mean CBL0137 logLC<sub>50</sub> values were calculated from 3 independent biological replicates. Kruskal-Wallis tests with multiple comparisons tests were performed to compare mean logLC<sub>50</sub> values between each cell line tested. Comparisons between TP53-wild-type and TP53-mutated cell lines are highlighted in yellow.

Table SII. LogLC<sub>50</sub> and LC<sub>50</sub> for CBL0137 in acute leukaemia cell lines.

| Cell line                            | logLC <sub>50</sub> (nM) | LC <sub>50</sub> (nM) |
|--------------------------------------|--------------------------|-----------------------|
| RS4;11                               | 2.22                     | 166.0                 |
| RCH-ACV                              | 2.48                     | 302.0                 |
| NALM-19                              | 2.39                     | 245.5                 |
| MV4;11                               | 2.43                     | 269.2                 |
| REH                                  | 2.65                     | 446.7                 |
| Jurkat                               | 2.72                     | 524.8                 |
| U-937                                | 2.75                     | 562.3                 |
| THP-1                                | 2.83                     | 676.1                 |
| RS4;11 Cas9                          | 2.32                     | 208.9                 |
| RS4;11 <i>TP53</i> <sup>MUT</sup> #1 | 2.59                     | 389.1                 |
| RS4;11 <i>TP53</i> <sup>MUT</sup> #2 | 2.62                     | 416.9                 |

Human acute leukaemia cell lines were exposed to increasing doses of CBL0137 in duplicate and apoptosis was measured by Annexin-V/7-AAD staining after 72 h. Mean CBL0137 logLC<sub>50</sub> values were calculated from 3 independent biological replicates. LogLC<sub>50</sub> and LC<sub>50</sub> values were extrapolated using non-linear regression analysis.
